# Supplementary material for: High Spectral Resolution Lidar – generation 2 (HSRL-2) retrievals of ocean surface wind speed: methodology and evaluation
Source: Copernicus journal article supplement (doi:10.5194/amt-17-3515-2024), 2024-06-10
Supplement: Supplementary file 1 [file amt-17-3515-2024-supplement.pdf]

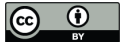

*Supplement of*

## **High Spectral Resolution Lidar – generation 2 (HSRL-2) retrievals of ocean surface wind speed: methodology and evaluation**

**Sanja Dmitrovic et al.**

*Correspondence to:* Armin Sorooshian ([armin@arizona.edu](mailto:armin@arizona.edu))

The copyright of individual parts of the supplement might differ from the article licence.

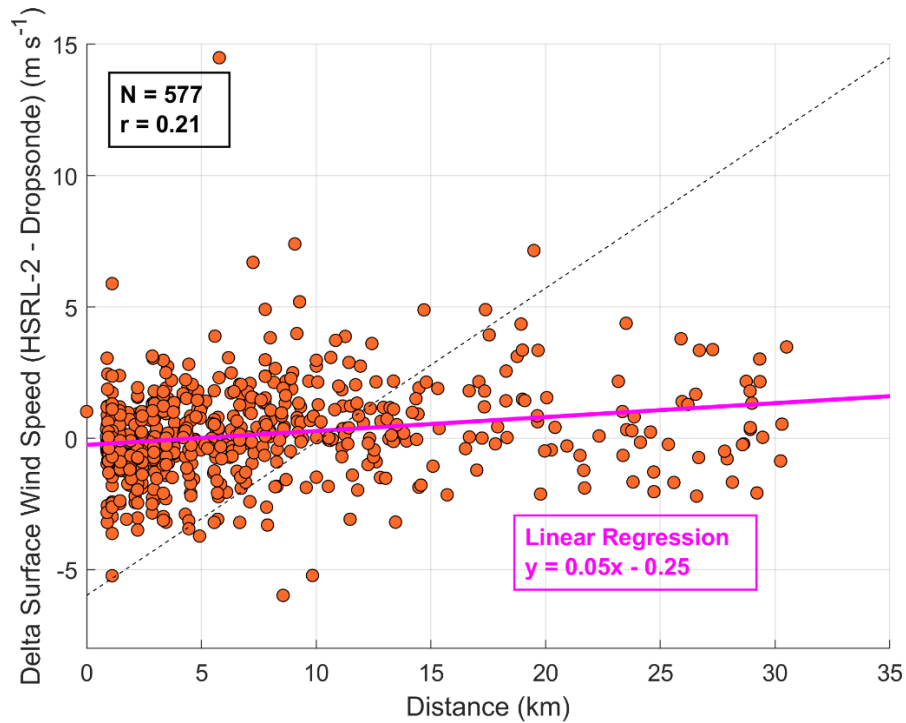

**Figure S1: Distance deltas of delta surface wind speed (HSRL-2 minus dropsonde) to observe how distance between measurements affects agreement in surface wind speed intercomparisons.**

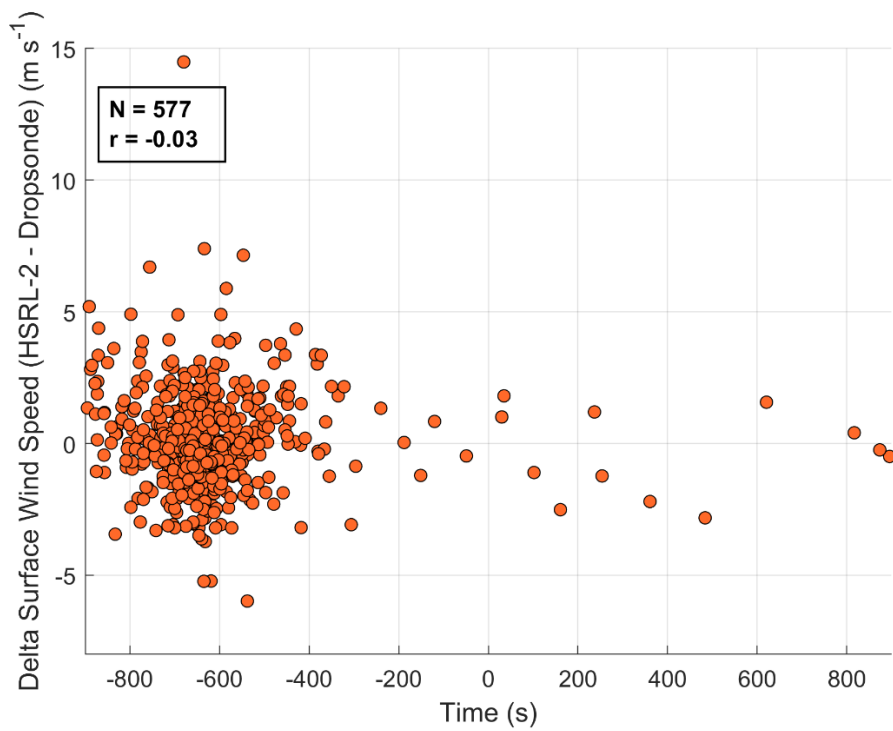

**Figure S2: Time deltas of delta surface wind speed (HSRL-2 minus dropsonde) to observe how time differences between measurements affect agreement in surface wind speed intercomparisons. Regression is not performed because there is no correlation between delta time and delta surface wind speed.**
